# Supplementary material for: Current Causes of Death in Familial Hypercholesterolemia
Source: Research Square preprint supplement (doi:10.21203/rs.3.rs-1196025/v1), 2021-12-30
Supplement: Supplementary file 1 [file 817172f8adcb66f9dedb07f3.pdf]

**Supplemental Table 1. Mortality among heFH and control fathers.**

| Subject                                     | heFH family members | Non-heFH family members | Control family members | <i>P</i> |
|---------------------------------------------|---------------------|-------------------------|------------------------|----------|
| N                                           | 33                  | 48                      | 81                     |          |
| Total dead, N (%)                           | 24 (72.7)           | 35 (72.9)               | 57 (70.4)              | 0.941    |
| Age death (years)                           | 68.75 (12.05)       | 74.11 (15.22)           | 73.70 (11.22)          | 0.217    |
| Age of Cardiovascular disease death (years) | 64.5 (10.7)         | 76.7 (13.0)             | 71.3 (11.8)            | 0.006    |
| Age of Non-cardiovascular death (years)     | 79.0 (8.7)          | 71 (15.7)               | 75.3 (10.6)            | 0.373    |
| Cardiovascular disease, N (%)               | 17 (70.8)           | 16 (40.4)               | 23 (40.4)              | 0.040    |
| Non-cardiovascular death, N (%)             | 7 (29.2)            | 19 (54.3)               | 34 (59.6)              |          |
| Cancer death, N (%)                         | 4 (57.1)            | 8 (42.1)                | 17 (50.0)              | 0.759    |
| Other death, N (%)                          | 3 (42.8)            | 11 (57.9)               | 17 (50.0)              |          |

Data are summarized as mean (SD) or N (percentage). Test for raw differences using Chi<sup>2</sup> test

**Supplemental Table 2. Mortality among heFH and control mothers.**

| Subject                                     | heFH family members | Non-heFH family members | Control family members | <i>P</i> |
|---------------------------------------------|---------------------|-------------------------|------------------------|----------|
| N                                           |                     |                         |                        |          |
| Family study women, N (%)                   | 50                  | 33                      | 82                     | 0.006    |
| Total dead, N (%)                           | 33 (66.0)           | 13 (39.4)               | 31 (37.8)              | 0.006    |
| Age death (years)                           | 72.4 (14.1)         | 79.4 (15.0)             | 78.3 (11.7)            | 0.071    |
| Age of Cardiovascular disease death (years) | 70.2 (13.5)         | 80.3 (6.9)              | 84.0 (7.4)             | 0.008    |
| Age of Non-cardiovascular death (years)     | 74.1 (14.7)         | 80.3 (17.7)             | 73.9 (12.0)            | 0.496    |
| Cardiovascular disease, N (%)               | 17 (51.5)           | 4 (30.7)                | 12 (37.5)              | 0.367    |
| Non- cardiovascular death, N (%)            | 16 (48.5)           | 9 (69.2)                | 19 (61.3)              |          |
| Cancer death, N (%)                         | 6 (30)              | 2 (10.0)                | 12 (60.0)              | 0.092    |
| Other death, N (%)                          | 10 (62.5)           | 7 (77.7)                | 7 (36.8)               |          |

Data are summarized as mean (SD) or N (percentage). Test for row differences using Chi<sup>2</sup> test
